# Supplementary material for: The Older the Better: Infanticide Is Age-Related for Both Victims and Perpetrators in Captive Long-Tailed Macaques
Source: MDPI journal article supplement (doi:10.3390/biology11071008), 2022-07-04
Supplement: s1 [file s1]

**Table S1.** Infant and mother characteristics. Characteristics of victims of infanticide (K) and infants at risk of infanticide that were not killed (NK) and their mothers during infanticidal male takeovers. Infants from an age between -162 (start pregnancy) and 215 (maximum age to shorten IBI) days of age were considered to be at risk of infanticide.

| Infant characteristics |      |     |                                    |                        | Mother characteristics |                                     |            |      |
|------------------------|------|-----|------------------------------------|------------------------|------------------------|-------------------------------------|------------|------|
| Name                   | Fate | Sex | Age at start male<br>tenure (days) | Age at death<br>(days) | Name                   | Age at start male<br>tenure (years) | Experience | Rank |
| Pooh2 <sup>a</sup>     | K    | M   | 248                                | 248                    | Ola                    | 7.5                                 | yes        | low  |
| Nnm1 <sup>b,c</sup>    | K    | M   | -1205 <sup>b,c</sup>               | 60                     | Deha                   | 0.5                                 | no         | low  |
| Nnf1                   | K    | F   | -75                                | 62                     | Papoa                  | 8.6                                 | yes        | high |
| Het Loo <sup>b</sup>   | K    | M   | -270 <sup>b</sup>                  | 112                    | Orka                   | 9.3                                 | yes        | low  |
| Nnf2                   | K    | F   | 32                                 | 37                     | Henna                  | 12.9                                | yes        | low  |
| Nnm2                   | K    | M   | -39                                | 26                     | Lixa                   | 17.5                                | yes        | high |
| Kahlua                 | K    | F   | -47                                | 94                     | Uha                    | 3.7                                 | no         | low  |
| Veenema <sup>a</sup>   | K    | F   | 404                                | 486                    | Milva                  | 4.9                                 | no         | low  |
| Bapao <sup>b,d</sup>   | K    | M   | 176 <sup>b</sup>                   | 197                    | Alfa                   | 8.2                                 | yes        | high |
| Haifa                  | K    | F   | 31                                 | 132                    | Fokwa                  | 7.6                                 | yes        | low  |
| Nnm3 <sup>b</sup>      | K    | M   | -194 <sup>b</sup>                  | 2                      | Sea                    | 8.3                                 | yes        | low  |
| Balata                 | K    | F   | 141                                | 147                    | Tres-bella             | 4.6                                 | no         | low  |
| Lao                    | K    | M   | 20                                 | 89                     | Alfa                   | 18.5                                | yes        | high |
| Tequilla <sup>b</sup>  | K    | F   | -182 <sup>b</sup>                  | 87                     | Lambada                | 7.1                                 | yes        | high |
| Manuchao               | K    | M   | -58                                | 69                     | Anastasia              | 3.9                                 | no         | high |
| Spa                    | NK   | F   | 122                                |                        | Pukkie                 | 16.0                                | yes        | low  |
| Deha                   | NK   | F   | 177                                |                        | Haasje                 | 9.6                                 | yes        | low  |
| Groucho                | NK   | M   | 151                                |                        | Henna                  | 7.0                                 | yes        | low  |
| Alfa                   | NK   | F   | 149                                |                        | Felix                  | 14.6                                | yes        | high |
| Tao                    | NK   | M   | 149                                |                        | Abba                   | 4.6                                 | no         | low  |
| Sla                    | NK   | F   | 114                                |                        | Lea                    | 4.9                                 | yes        | high |
| Bona                   | NK   | F   | 77                                 |                        | Nasa                   | 5.5                                 | no         | low  |
| Ikea                   | NK   | F   | 33                                 |                        | Exa                    | 12.6                                | yes        | high |
| Livorno                | NK   | M   | 20                                 |                        | Norma                  | 11.6                                | yes        | low  |
| Aloa                   | NK   | F   | -72                                |                        | Oor                    | 13.6                                | yes        | high |
| Nena                   | NK   | F   | 210                                |                        | Nasa                   | 10.2                                | yes        | low  |
| Miao                   | NK   | M   | 128                                |                        | Abba                   | 9.3                                 | yes        | low  |
| Djoba                  | NK   | F   | 125                                |                        | Bona                   | 4.9                                 | no         | low  |
| Sjattoa                | NK   | F   | 123                                |                        | Opa                    | 4.1                                 | no         | high |
| Bilboa                 | NK   | F   | 106                                |                        | Orka                   | 9.3                                 | yes        | low  |
| Hanso                  | NK   | M   | 106                                |                        | Saga                   | 9.5                                 | yes        | low  |
| Epha                   | NK   | F   | 36                                 |                        | Henna                  | 11.7                                | yes        | low  |
| Wubbo                  | NK   | M   | -33                                |                        | Boa                    | 11.7                                | yes        | high |
| Mikado                 | NK   | M   | 195                                |                        | Dracula                | 5.3                                 | yes        | high |
| Nononono               | NK   | M   | 190                                |                        | Nasa                   | 11.5                                | yes        | low  |
| Paramo                 | NK   | M   | 169                                |                        | Manna                  | 11.0                                | yes        | low  |

Table S1. *Cont.*

| Infant characteristics |      |     |                                    |                        | Mother characteristics |                                     |            |      |
|------------------------|------|-----|------------------------------------|------------------------|------------------------|-------------------------------------|------------|------|
| Name                   | Fate | Sex | Age at start male<br>tenure (days) | Age at death<br>(days) | Name                   | Age at start male<br>tenure (years) | Experience | Rank |
| Toco                   | NK   | M   | 167                                |                        | Cheba                  | 5.5                                 | yes        | high |
| Esso                   | NK   | M   | 141                                |                        | Geel                   | 16.5                                | yes        | low  |
| Kufo                   | NK   | M   | -39                                |                        | Felix                  | 21.5                                | yes        | high |
| Rastafa                | NK   | F   | 201                                |                        | Freya                  | 5.4                                 | no         | low  |
| Jura                   | NK   | F   | 176                                |                        | Roza                   | 13.4                                | yes        | low  |
| Wiepkema               | NK   | F   | 173                                |                        | Milva                  | 5.8                                 | no         | low  |
| Katua                  | NK   | F   | 105                                |                        | Upupa                  | 8.4                                 | yes        | high |
| Stoa                   | NK   | F   | 72                                 |                        | Ola                    | 19.7                                | yes        | low  |
| Bolero                 | NK   | M   | 63                                 |                        | Rassoa                 | 4.2                                 | no         | low  |
| Nacho                  | NK   | M   | 28                                 |                        | Hoempa                 | 13.0                                | yes        | high |
| Inca                   | NK   | F   | -36                                |                        | Chiwawa                | 3.6                                 | no         | low  |
| Zazaa                  | NK   | F   | -54                                |                        | Aha                    | 9.1                                 | yes        | high |
| Winnebago              | NK   | M   | -27                                |                        | Geisha                 | 8.8                                 | yes        | low  |
| Mustafo                | NK   | M   | -140                               |                        | Fransisca              | 4.1                                 | no         | low  |

<sup>a,b</sup> Infants that were killed, but do not meet the criteria of being at risk since they were: <sup>a</sup> either too old to shorten the IBB, or <sup>b</sup> could have been fathered by the infanticidal male himself since he attained the alpha position before the time of conception. <sup>c</sup> This infant was killed about three years after the alpha male became resident in the group. <sup>d</sup> Infant that was killed during a reintroduction of the alpha male after an absence of eight months, he was sired during the previous tenure of the same male. K = killed, NK = not killed, M = male, F = female.
